# Supplementary material
Source: publisher site journal article supplement (https://www.dovepress.com/get_supplementary_file.php?f=447148.docx)
Supplement: Supplementary file 1 [file get_supplementary_file.php]

**TableS1** Sulcal mean depth differences between CM , EM, and HCs group

| region | CM | EM | HC | ANCOVA statistics | |  | Post-hoc pairwise comparisons, *Padj* | | |
| --- | --- | --- | --- | --- | --- | --- | --- | --- | --- |
| *F* | *P* | *Q value* | CM-HC | EM-HC | CM-EM |
| F.C.M.ant._lefta | 10.28±1.7 | 9.53±1.72 | 8.51±1.94 | 8.83 | <0.001 | 0.013 | <0.001 | 0.053 | 0.187 |
| S.F.sup._leftb | 14.45±1.75 | 15.96±1.88 | 15.51±1.87 | 7.02 | 0.001 | 0.021 | 0.018 | >0.999 | 0.002 |
| S.F.sup._rightb | 13.5±2.03 | 15.85±2.24 | 15.37±2.18 | 6.98 | 0.001 | 0.021 | 0.012 | >0.999 | 0.003 |
| S.F.median._leftb | 6.77±0.89 | 7.58±1.36 | 7.52±1.05 | 6.13 | 0.003 | 0.034 | 0.008 | >0.999 | 0.011 |
| S.F.polaire.tr._right | 6.9±1.15 | 7.66±1.5 | 6.91±1.48 | 3.75 | 0.027 | 0.156 | >0.999 | 0.051 | 0.076 |
| S.F.inter._left | 11.58±1.6 | 12.28±1.26 | 11.35±1.34 | 3.72 | 0.028 | 0.156 | >0.999 | 0.027 | 0.23 |
| S.F.inf.ant._right | 8.81±1.61 | 9.86±1.48 | 9.11±1.55 | 3.7 | 0.028 | 0.156 | >0.999 | 0.199 | 0.029 |
| S.F.median._right | 6.85±1.06 | 7.61±1.79 | 6.87±0.92 | 3.69 | 0.028 | 0.156 | >0.999 | 0.049 | 0.088 |
| S.F.polaire.tr._left | 6.76±1.42 | 7.3±1.43 | 6.6±1.25 | 3.25 | 0.043 | 0.193 | >0.999 | 0.041 | 0.337 |
| OCCIPITAL_left | 9.61±1.13 | 10.07±0.75 | 9.85±1.03 | 3.23 | 0.044 | 0.193 | 0.555 | 0.798 | 0.038 |
| S.Pe.C.marginal._left | 12.35±4.5 | 14.71±4.7 | 14.15±4.26 | 2.72 | 0.071 | 0.284 | 0.257 | >0.999 | 0.089 |
| S.Pa.sup._left | 8.55±3.4 | 10.42±3.22 | 9.08±3.95 | 2.48 | 0.089 | 0.325 | >0.999 | 0.293 | 0.117 |
| S.F.inf._right | 13.13±2.77 | 14.12±2.3 | 13.99±2.91 | 2.01 | 0.139 | 0.46 | 0.189 | >0.999 | 0.388 |
| S.Pe.C.inter._right | 14.28±1.9 | 14.88±2.61 | 13.69±1.83 | 1.96 | 0.147 | 0.46 | 0.954 | 0.152 | 0.97 |
| OCCIPITAL_right | 10.01±0.63 | 10.2±0.8 | 9.86±0.84 | 1.85 | 0.163 | 0.478 | >0.999 | 0.176 | 0.853 |
| S.F.inter._right | 12.09±1.28 | 11.94±1.33 | 11.59±1.18 | 1.57 | 0.214 | 0.587 | 0.265 | 0.62 | >0.999 |
| S.T.pol._left | 8.58±1.04 | 8.9±1.2 | 9.25±1.35 | 1.49 | 0.23 | 0.587 | 0.264 | 0.942 | >0.999 |
| S.Pe.C.marginal._right | 12.8±5.12 | 14.18±3.16 | 12.29±3.72 | 1.39 | 0.253 | 0.587 | >0.999 | 0.41 | 0.534 |
| S.Po.C.sup._left | 11.99±2.68 | 13.18±3.54 | 12.4±3.2 | 1.36 | 0.261 | 0.587 | >0.999 | 0.836 | 0.334 |
| S.T.s._right | 17.92±1.93 | 17.14±2.27 | 17.03±1.86 | 1.33 | 0.269 | 0.587 | 0.803 | >0.999 | 0.349 |
| S.F.inf._left | 13.24±1.96 | 13.71±2.51 | 13.93±2.95 | 1.29 | 0.28 | 0.587 | 0.339 | >0.999 | >0.999 |
| S.Pe.C.inf._left | 15.43±2.3 | 15.16±2.32 | 14.77±2.3 | 1.22 | 0.3 | 0.593 | 0.366 | >0.999 | >0.999 |
| S.Call._left | 6.99±0.97 | 6.91±1.09 | 7.46±1.66 | 1.18 | 0.31 | 0.593 | 0.667 | 0.459 | >0.999 |
| S.Pe.C.inter._left | 15.41±2.19 | 14.99±2.01 | 15.59±2.82 | 1 | 0.372 | 0.681 | >0.999 | 0.485 | >0.999 |
| S.T.pol._right | 8.43±1.33 | 8.71±0.86 | 8.9±1.17 | 0.89 | 0.415 | 0.73 | 0.603 | >0.999 | >0.999 |
| F.I.P._left | 17.44±1.63 | 17.8±1.59 | 17.04±1.6 | 0.75 | 0.475 | 0.771 | >0.999 | 0.868 | 0.906 |
| F.I.P._right | 17.12±1.49 | 16.78±1.3 | 16.43±1.3 | 0.73 | 0.486 | 0.771 | 0.846 | >0.999 | 0.969 |
| S.Po.C.sup._right | 11.29±3.64 | 12.1±4.11 | 11.88±4.14 | 0.67 | 0.516 | 0.771 | 0.897 | >0.999 | >0.999 |
| INSULA_right | 28.42±4.43 | 27.31±4.69 | 27.88±4.54 | 0.66 | 0.518 | 0.771 | 0.894 | >0.999 | >0.999 |
| S.Pe.C.median._left | 9.19±2.75 | 9.31±2.65 | 9.95±3.08 | 0.63 | 0.534 | 0.771 | 0.962 | >0.999 | >0.999 |
| S.T.s._left | 16±1.75 | 15.63±1.68 | 15.5±1.98 | 0.59 | 0.559 | 0.771 | >0.999 | >0.999 | 0.964 |
| S.F.int._right | 8.29±1.74 | 8.02±1.03 | 7.77±0.91 | 0.58 | 0.56 | 0.771 | 0.984 | >0.999 | >0.999 |
| INSULA_left | 28.36±4.82 | 29.03±4.56 | 28.28±4.76 | 0.51 | 0.602 | 0.789 | >0.999 | 0.947 | >0.999 |
| S.Pe.C.sup._right | 14.12±4.01 | 14.63±3.55 | 15.25±4.23 | 0.5 | 0.61 | 0.789 | 0.998 | >0.999 | >0.999 |
| S.C._right | 16.76±2.34 | 16.39±2.85 | 16.43±2.55 | 0.31 | 0.732 | 0.896 | >0.999 | >0.999 | >0.999 |
| S.Pe.C.sup._left | 15.15±4.11 | 15.14±4.03 | 15.71±3.96 | 0.29 | 0.752 | 0.896 | >0.999 | >0.999 | >0.999 |
| S.Pe.C.median._right | 9.25±2.86 | 9.74±2.5 | 9.17±2.34 | 0.28 | 0.753 | 0.896 | >0.999 | >0.999 | >0.999 |
| S.Pe.C.inf._right | 14.79±3.59 | 15.58±2.96 | 15.01±3.63 | 0.21 | 0.811 | 0.939 | >0.999 | >0.999 | >0.999 |
| S.Call._right | 8.06±2.55 | 7.96±1.44 | 8.04±1.38 | 0.17 | 0.842 | 0.95 | >0.999 | >0.999 | >0.999 |
| F.C.M.ant._right | 10.76±3.86 | 10.62±2.13 | 10.61±1.64 | 0.14 | 0.869 | 0.956 | >0.999 | >0.999 | >0.999 |
| S.Pa.sup._right | 9.85±2.51 | 10.09±3.26 | 10.11±3.44 | 0.02 | 0.977 | 0.988 | >0.999 | >0.999 | >0.999 |
| S.F.inf.ant._left | 9.23±1.7 | 9.15±2.39 | 8.88±2.01 | 0.02 | 0.985 | 0.988 | >0.999 | >0.999 | >0.999 |
| S.C._left | 17.43±1.44 | 17.43±1.73 | 17.59±1.73 | 0.01 | 0.987 | 0.988 | >0.999 | >0.999 | >0.999 |
| S.F.int._left | 7.91±0.86 | 8±1.21 | 7.93±1 | 0.01 | 0.988 | 0.988 | >0.999 | >0.999 | >0.999 |

Notes: Data are reported as mean ± standard deviation. Analysis of covariance(ANCOVA ) adjusted for age and sex was used to compare group differences, followed by both Bonferroni and FDR correction. *Q* value, adusted *P* value after FDR correction; a Significant P value after Bonferroni correction; b Significant P value after FDR correction. Then, post-hoc pairwise comparisons using Bonferroni correction were conducted to examine between-group differences, with *Padj* < 0.05 indicating significant differences.

Abbreviations: CM, chronic migraine; EM, episodic migraine; HCs, healthy controls; *Padj* , adjusted *P* value after post-hoc pairwise correction using Bonferroni correction; F.C.M.ant., anterior callosomarginal fissure; F.I.P., intraparietal sulcus; INSULA, insula sulci; OCCIPITAL, occipital sulci; S.C., central sulcus; S.Call., subcallosal sulcus; S.F.inf., inferior frontal sulcus; S.F.inf.ant., anterior inferior frontal sulcus; S.F.int., internal frontal sulcus; S.F.inter., intermediate frontal sulcus; S.F.median., median frontal sulcus; S.F.polaire.tr., polar frontal sulcus; S.F.sup., superior frontal sulcus; S.Pa.sup., superior parietal sulcus; S.Pe.C.inf., inferior precentral sulcus; S.Pe.C.inter., intermediate precentral sulcus; S.Pe.C.marginal., marginal precentral sulcus; S.Pe.C.median., median precentral sulcus; S.Pe.C.sup., superior precentral sulcus; S.Po.C.sup., superior postcentral sulcus; S.T.pol., polar temporal sulcus; S.T.s., superior temporal sulcus;

**TableS2** Sulcal cortical thickness differences between CM , EM, and HCs group

| region | CM | EM | HC | ANCOVA statistics | |  | Post-hoc pairwise comparisons, *Padj* | | |
| --- | --- | --- | --- | --- | --- | --- | --- | --- | --- |
| *F* | *P* | *Q value* | CM-HC | EM-HC | CM-EM |
| S.Po.C.sup._lefta | 3.43±0.13 | 3.09±0.22 | 3.07±0.19 | 40.99 | <0.001 | <0.001 | <0.001 | >0.999 | <0.001 |
| S.Po.C.sup._righta | 3.48±0.17 | 3.07±0.25 | 3.05±0.23 | 39.24 | <0.001 | <0.001 | <0.001 | >0.999 | <0.001 |
| S.F.median._lefta | 4.06±0.26 | 3.88±0.21 | 3.82±0.19 | 10.96 | <0.001 | 0.001 | <0.001 | >0.999 | 0.001 |
| S.F.median._rightb | 4.06±0.22 | 3.87±0.21 | 3.91±0.21 | 7.15 | 0.001 | 0.014 | 0.126 | 0.346 | 0.001 |
| S.Pa.sup._leftb | 3.45±0.2 | 3.28±0.39 | 3.37±0.38 | 5.59 | 0.005 | 0.044 | 0.583 | 0.178 | 0.004 |
| S.Pe.C.sup._right | 3.75±0.19 | 3.65±0.22 | 3.67±0.22 | 3.59 | 0.031 | 0.228 | 0.383 | 0.9 | 0.027 |
| S.Pa.sup._right | 3.36±0.19 | 3.3±0.33 | 3.21±0.16 | 2.79 | 0.066 | 0.417 | 0.061 | 0.51 | 0.92 |
| S.F.polaire.tr._right | 3.61±0.2 | 3.63±0.24 | 3.62±0.23 | 2.38 | 0.097 | 0.536 | >0.999 | 0.636 | 0.098 |
| S.Pe.C.inf._left | 3.71±0.24 | 3.65±0.18 | 3.61±0.24 | 1.94 | 0.148 | 0.725 | 0.207 | >0.999 | 0.389 |
| S.Pe.C.median._right | 3.66±0.28 | 3.7±0.28 | 3.72±0.26 | 1.29 | 0.28 | 0.776 | 0.349 | 0.863 | >0.999 |
| S.F.int._right | 3.9±0.21 | 3.85±0.2 | 3.87±0.19 | 1.28 | 0.283 | 0.776 | >0.999 | >0.999 | 0.345 |
| S.F.sup._left | 3.7±0.19 | 3.68±0.19 | 3.62±0.18 | 1.26 | 0.289 | 0.776 | >0.999 | 0.645 | 0.447 |
| S.Pe.C.inter._left | 3.74±0.22 | 3.71±0.21 | 3.65±0.18 | 1.22 | 0.299 | 0.776 | 0.402 | >0.999 | 0.831 |
| S.F.inf._right | 3.42±0.19 | 3.37±0.17 | 3.34±0.21 | 1.2 | 0.305 | 0.776 | 0.622 | >0.999 | 0.496 |
| S.Pe.C.inf._right | 3.55±0.21 | 3.52±0.21 | 3.56±0.18 | 1.2 | 0.306 | 0.776 | >0.999 | 0.374 | >0.999 |
| F.I.P._right | 3.36±0.2 | 3.31±0.19 | 3.26±0.16 | 1.13 | 0.326 | 0.776 | 0.533 | >0.999 | 0.659 |
| S.T.pol._left | 4.55±0.27 | 4.63±0.28 | 4.49±0.35 | 1 | 0.373 | 0.776 | >0.999 | 0.535 | 0.971 |
| S.F.inf.ant._right | 3.62±0.26 | 3.56±0.21 | 3.55±0.2 | 0.99 | 0.376 | 0.776 | >0.999 | >0.999 | 0.494 |
| S.C._right | 3.29±0.18 | 3.29±0.26 | 3.3±0.25 | 0.94 | 0.394 | 0.776 | 0.997 | 0.554 | >0.999 |
| S.F.inter._left | 3.64±0.22 | 3.6±0.19 | 3.55±0.2 | 0.9 | 0.409 | 0.776 | 0.694 | >0.999 | 0.807 |
| S.F.polaire.tr._left | 3.73±0.25 | 3.67±0.2 | 3.69±0.22 | 0.87 | 0.421 | 0.776 | 0.594 | >0.999 | >0.999 |
| S.Pe.C.marginal._right | 3.77±0.35 | 3.68±0.24 | 3.69±0.23 | 0.87 | 0.423 | 0.776 | >0.999 | >0.999 | 0.603 |
| S.F.inf.ant._left | 3.66±0.24 | 3.7±0.27 | 3.61±0.19 | 0.85 | 0.431 | 0.776 | >0.999 | 0.632 | >0.999 |
| INSULA_left | 3.71±0.21 | 3.8±0.23 | 3.74±0.23 | 0.83 | 0.438 | 0.776 | >0.999 | >0.999 | 0.625 |
| S.Call._right | 3.61±0.18 | 3.57±0.21 | 3.6±0.18 | 0.83 | 0.441 | 0.776 | >0.999 | >0.999 | 0.627 |
| S.F.int._left | 3.98±0.19 | 3.98±0.17 | 3.94±0.16 | 0.76 | 0.47 | 0.796 | 0.672 | >0.999 | >0.999 |
| S.Pe.C.inter._right | 3.58±0.2 | 3.55±0.17 | 3.51±0.18 | 0.67 | 0.516 | 0.81 | 0.958 | >0.999 | 0.971 |
| S.F.inter._right | 3.52±0.23 | 3.49±0.22 | 3.44±0.21 | 0.58 | 0.56 | 0.81 | 0.907 | >0.999 | >0.999 |
| F.C.M.ant._right | 3.98±0.28 | 4.01±0.22 | 4.05±0.32 | 0.55 | 0.577 | 0.81 | 0.964 | >0.999 | >0.999 |
| S.Pe.C.median._left | 3.76±0.48 | 3.83±0.42 | 3.69±0.3 | 0.54 | 0.583 | 0.81 | >0.999 | >0.999 | >0.999 |
| F.I.P._left | 3.31±0.16 | 3.29±0.18 | 3.25±0.15 | 0.54 | 0.587 | 0.81 | >0.999 | >0.999 | 0.981 |
| S.C._left | 3.29±0.15 | 3.29±0.16 | 3.28±0.21 | 0.5 | 0.609 | 0.81 | >0.999 | >0.999 | >0.999 |
| F.C.M.ant._left | 4.12±0.28 | 4.11±0.3 | 4.06±0.31 | 0.48 | 0.619 | 0.81 | 0.985 | >0.999 | >0.999 |
| S.Call._left | 3.74±0.17 | 3.71±0.19 | 3.72±0.24 | 0.44 | 0.643 | 0.81 | >0.999 | >0.999 | >0.999 |
| S.T.pol._right | 4.4±0.28 | 4.46±0.36 | 4.37±0.26 | 0.44 | 0.645 | 0.81 | >0.999 | >0.999 | >0.999 |
| S.F.sup._right | 3.61±0.19 | 3.54±0.18 | 3.55±0.17 | 0.35 | 0.703 | 0.859 | >0.999 | >0.999 | >0.999 |
| OCCIPITAL_left | 3.48±0.23 | 3.49±0.25 | 3.4±0.17 | 0.3 | 0.744 | 0.879 | >0.999 | >0.999 | >0.999 |
| INSULA_right | 3.7±0.2 | 3.75±0.19 | 3.72±0.2 | 0.27 | 0.761 | 0.879 | >0.999 | >0.999 | >0.999 |
| S.Pe.C.sup._left | 3.77±0.3 | 3.78±0.26 | 3.7±0.27 | 0.25 | 0.779 | 0.879 | >0.999 | >0.999 | >0.999 |
| S.Pe.C.marginal._left | 3.83±0.38 | 3.78±0.3 | 3.73±0.39 | 0.2 | 0.82 | 0.885 | >0.999 | >0.999 | >0.999 |
| S.F.inf._left | 3.49±0.18 | 3.49±0.18 | 3.45±0.17 | 0.18 | 0.839 | 0.885 | >0.999 | >0.999 | >0.999 |
| S.T.s._left | 3.98±0.24 | 4.01±0.2 | 3.97±0.19 | 0.17 | 0.845 | 0.885 | >0.999 | >0.999 | >0.999 |
| S.T.s._right | 3.9±0.26 | 3.89±0.23 | 3.88±0.23 | 0.12 | 0.886 | 0.907 | >0.999 | >0.999 | >0.999 |
| OCCIPITAL_right | 3.58±0.22 | 3.57±0.23 | 3.52±0.18 | 0.07 | 0.937 | 0.937 | >0.999 | >0.999 | >0.999 |

Notes: Data are reported as mean ± standard deviation. Analysis of covariance(ANCOVA ) adjusted for age and sex was used to compare group differences, followed by both Bonferroni and FDR correction. *Q* value, adusted *P* value after FDR correction; a Significant P value after Bonferroni correction; b Significant P value after FDR correction. Then, post-hoc pairwise comparisons using Bonferroni correction were conducted to examine between-group differences, with *Padj* < 0.05 indicating significant differences.

Abbreviations: CM, chronic migraine; EM, episodic migraine; HCs, healthy controls; *Padj* value, adjusted *P* value after post-hoc pairwise correction using Bonferroni correction; F.C.M.ant., anterior callosomarginal fissure; F.I.P., intraparietal sulcus; INSULA, insula sulci; OCCIPITAL, occipital sulci; S.C., central sulcus; S.Call., subcallosal sulcus; S.F.inf., inferior frontal sulcus; S.F.inf.ant., anterior inferior frontal sulcus; S.F.int., internal frontal sulcus; S.F.inter., intermediate frontal sulcus; S.F.median., median frontal sulcus; S.F.polaire.tr., polar frontal sulcus; S.F.sup., superior frontal sulcus; S.Pa.sup., superior parietal sulcus; S.Pe.C.inf., inferior precentral sulcus; S.Pe.C.inter., intermediate precentral sulcus; S.Pe.C.marginal., marginal precentral sulcus; S.Pe.C.median., median precentral sulcus; S.Pe.C.sup., superior precentral sulcus; S.Po.C.sup., superior postcentral sulcus; S.T.pol., polar temporal sulcus; S.T.s., superior temporal sulcus;

**TableS3** Sulcal opening width differences between CM , EM, and HCs group

| region | CM | EM | HC | ANCOVA statistics | |  | Post-hoc pairwise comparisons, *Padj* | | |
| --- | --- | --- | --- | --- | --- | --- | --- | --- | --- |
| *F* | *P* | *Q value* | CM-HC | EM-HC | CM-EM |
| INSULA_righta | 1.36±0.36 | 1.32±0.23 | 1.12±0.2 | 8.71 | <0.001 | 0.014 | 0.001 | 0.001 | >0.999 |
| INSULA_leftb | 1.38±0.37 | 1.27±0.29 | 1.12±0.21 | 6.89 | 0.002 | 0.035 | 0.002 | 0.025 | >0.999 |
| S.T.pol._left | 1.07±0.46 | 0.98±0.32 | 0.91±0.35 | 2.89 | 0.06 | 0.787 | 0.087 | 0.155 | >0.999 |
| S.T.s._left | 0.92±0.24 | 0.82±0.18 | 0.82±0.19 | 2.56 | 0.083 | 0.787 | 0.105 | >0.999 | 0.282 |
| F.C.M.ant._left | 1.23±0.36 | 1.28±0.47 | 1.7±1.02 | 2.42 | 0.094 | 0.787 | 0.107 | 0.338 | >0.999 |
| S.Pe.C.sup._right | 1.21±0.36 | 1.38±0.47 | 1.24±0.41 | 2.1 | 0.128 | 0.787 | >0.999 | 0.553 | 0.143 |
| S.F.int._right | 1.78±0.44 | 1.96±0.46 | 1.92±0.41 | 1.78 | 0.174 | 0.787 | 0.567 | >0.999 | 0.215 |
| S.F.median._right | 1.77±0.78 | 1.62±0.52 | 1.97±0.81 | 1.75 | 0.18 | 0.787 | 0.437 | 0.244 | >0.999 |
| S.Pe.C.marginal._right | 1.24±0.57 | 1.35±0.42 | 1.47±0.46 | 1.72 | 0.185 | 0.787 | 0.256 | >0.999 | 0.483 |
| S.F.sup._right | 1.41±0.38 | 1.35±0.24 | 1.42±0.32 | 1.7 | 0.189 | 0.787 | >0.999 | 0.207 | 0.976 |
| S.Pe.C.marginal._left | 1.4±0.82 | 1.37±0.58 | 1.24±0.48 | 1.65 | 0.197 | 0.787 | 0.363 | 0.327 | >0.999 |
| S.F.inf._right | 1.38±0.4 | 1.29±0.26 | 1.25±0.26 | 1.42 | 0.248 | 0.908 | 0.361 | 0.537 | >0.999 |
| S.F.inf.ant._left | 1.49±0.4 | 1.36±0.51 | 1.49±0.43 | 1.18 | 0.313 | 0.925 | >0.999 | >0.999 | 0.4 |
| S.C._right | 1.41±0.38 | 1.53±0.36 | 1.49±0.3 | 1.17 | 0.316 | 0.925 | >0.999 | 0.857 | 0.437 |
| F.C.M.ant._right | 1.34±0.37 | 1.34±0.49 | 1.2±0.35 | 1.1 | 0.338 | 0.925 | 0.654 | 0.543 | >0.999 |
| S.Call._right | 1.24±0.46 | 1.3±0.46 | 1.31±0.44 | 1.07 | 0.348 | 0.925 | 0.446 | >0.999 | >0.999 |
| S.Pe.C.inter._right | 1.37±0.37 | 1.39±0.23 | 1.37±0.34 | 0.98 | 0.38 | 0.925 | >0.999 | 0.747 | 0.655 |
| S.Po.C.sup._left | 1.99±0.63 | 2.11±0.67 | 2.05±0.6 | 0.87 | 0.42 | 0.925 | >0.999 | 0.587 | >0.999 |
| OCCIPITAL_right | 0.7±0.22 | 0.68±0.16 | 0.77±0.19 | 0.78 | 0.462 | 0.925 | >0.999 | 0.683 | >0.999 |
| S.F.polaire.tr._left | 2.4±1.06 | 2.06±0.61 | 2.22±0.88 | 0.72 | 0.489 | 0.925 | 0.831 | >0.999 | >0.999 |
| S.Pe.C.median._right | 1.38±0.67 | 1.44±0.58 | 1.54±0.57 | 0.71 | 0.495 | 0.925 | 0.842 | >0.999 | >0.999 |
| S.Pa.sup._right | 2.05±0.75 | 2.49±1.57 | 2.96±3.19 | 0.63 | 0.534 | 0.925 | 0.908 | >0.999 | >0.999 |
| S.Pa.sup._left | 2.12±0.82 | 2.15±0.67 | 2.09±0.89 | 0.59 | 0.557 | 0.925 | >0.999 | 0.842 | >0.999 |
| S.T.pol._right | 0.91±0.39 | 0.96±0.41 | 0.91±0.37 | 0.58 | 0.564 | 0.925 | >0.999 | 0.866 | >0.999 |
| S.Pe.C.inf._right | 1.54±0.46 | 1.45±0.37 | 1.46±0.36 | 0.52 | 0.597 | 0.925 | 0.998 | >0.999 | >0.999 |
| S.F.sup._left | 1.39±0.38 | 1.29±0.27 | 1.31±0.28 | 0.48 | 0.622 | 0.925 | >0.999 | >0.999 | 0.994 |
| S.Pe.C.sup._left | 1.3±0.43 | 1.21±0.39 | 1.16±0.4 | 0.46 | 0.633 | 0.925 | >0.999 | >0.999 | >0.999 |
| S.F.inf.ant._right | 1.43±0.37 | 1.33±0.3 | 1.39±0.35 | 0.46 | 0.634 | 0.925 | >0.999 | >0.999 | >0.999 |
| OCCIPITAL_left | 0.81±0.3 | 0.75±0.24 | 0.84±0.22 | 0.4 | 0.672 | 0.925 | >0.999 | >0.999 | >0.999 |
| S.Po.C.sup._right | 2.09±0.73 | 2.17±0.71 | 2.27±0.93 | 0.37 | 0.692 | 0.925 | >0.999 | >0.999 | >0.999 |
| S.T.s._right | 1.03±0.33 | 1.02±0.22 | 0.99±0.21 | 0.34 | 0.71 | 0.925 | >0.999 | >0.999 | >0.999 |
| S.F.int._left | 1.86±0.5 | 1.72±0.28 | 1.83±0.42 | 0.32 | 0.73 | 0.925 | >0.999 | >0.999 | >0.999 |
| S.Pe.C.inf._left | 1.36±0.34 | 1.33±0.3 | 1.41±0.28 | 0.31 | 0.731 | 0.925 | >0.999 | >0.999 | >0.999 |
| S.C._left | 1.4±0.31 | 1.41±0.28 | 1.45±0.28 | 0.31 | 0.737 | 0.925 | >0.999 | >0.999 | >0.999 |
| S.Pe.C.inter._left | 1.2±0.28 | 1.21±0.28 | 1.23±0.26 | 0.27 | 0.761 | 0.925 | >0.999 | >0.999 | >0.999 |
| S.Call._left | 1.13±0.32 | 1.12±0.65 | 1.15±0.48 | 0.24 | 0.785 | 0.925 | >0.999 | >0.999 | >0.999 |
| S.F.inter._left | 1.17±0.34 | 1.12±0.27 | 1.18±0.25 | 0.23 | 0.797 | 0.925 | >0.999 | >0.999 | >0.999 |
| S.F.inf._left | 1.26±0.29 | 1.22±0.27 | 1.21±0.28 | 0.23 | 0.798 | 0.925 | >0.999 | >0.999 | >0.999 |
| S.F.median._left | 2.28±2.39 | 1.73±0.68 | 1.8±0.49 | 0.16 | 0.851 | 0.941 | >0.999 | >0.999 | >0.999 |
| S.F.polaire.tr._right | 2.2±0.82 | 1.95±0.49 | 2.22±0.7 | 0.14 | 0.873 | 0.941 | >0.999 | >0.999 | >0.999 |
| F.I.P._left | 1.39±0.33 | 1.34±0.34 | 1.41±0.25 | 0.11 | 0.897 | 0.941 | >0.999 | >0.999 | >0.999 |
| S.Pe.C.median._left | 1.64±0.99 | 1.42±0.62 | 1.58±0.82 | 0.11 | 0.898 | 0.941 | >0.999 | >0.999 | >0.999 |
| S.F.inter._right | 1.19±0.38 | 1.18±0.26 | 1.2±0.28 | 0.03 | 0.968 | 0.969 | >0.999 | >0.999 | >0.999 |
| F.I.P._right | 1.34±0.4 | 1.33±0.33 | 1.4±0.29 | 0.03 | 0.969 | 0.969 | >0.999 | >0.999 | >0.999 |

Notes: Data are reported as mean ± standard deviation. Analysis of covariance (ANCOVA) adjusted for age and sex was used to compare group differences, followed by both Bonferroni and FDR correction. *Q* value, adusted *P* value after FDR correction; a Significant P value after Bonferroni correction; b Significant *P* value after FDR correction. Then, post-hoc pairwise comparisons using Bonferroni correction were conducted to examine between-group differences, with *Padj* < 0.05 indicating significant differences.

Abbreviations: CM, chronic migraine; EM, episodic migraine; HCs, healthy controls; *Padj* value, adjusted *P* value after post-hoc pairwise correction using Bonferroni correction; F.C.M.ant., anterior callosomarginal fissure; F.I.P., intraparietal sulcus; INSULA, insula sulci; OCCIPITAL, occipital sulci; S.C., central sulcus; S.Call., subcallosal sulcus; S.F.inf., inferior frontal sulcus; S.F.inf.ant., anterior inferior frontal sulcus; S.F.int., internal frontal sulcus; S.F.inter., intermediate frontal sulcus; S.F.median., median frontal sulcus; S.F.polaire.tr., polar frontal sulcus; S.F.sup., superior frontal sulcus; S.Pa.sup., superior parietal sulcus; S.Pe.C.inf., inferior precentral sulcus; S.Pe.C.inter., intermediate precentral sulcus; S.Pe.C.marginal., marginal precentral sulcus; S.Pe.C.median., median precentral sulcus; S.Pe.C.sup., superior precentral sulcus; S.Po.C.sup., superior postcentral sulcus; S.T.pol., polar temporal sulcus; S.T.s., superior temporal sulcus;
